# Supplementary material
Source: publisher figshare collection journal article supplement (https://frontiersin.figshare.com/ndownloader/files/15176189)
Supplement: Supplementary file [file 15176189]

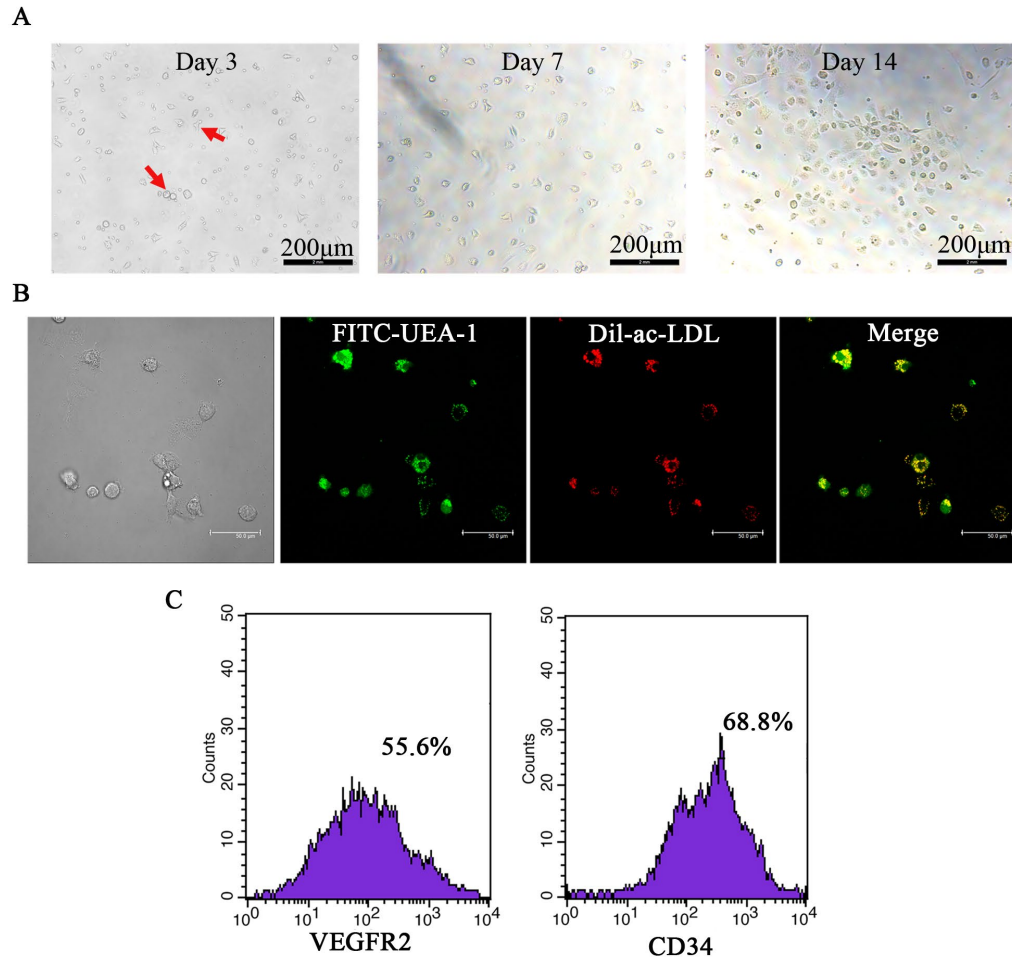

**Supplementary FIGURE 1 | Immunofluorescence identification and immunophenotyping of bone marrow derived-EPCs.**

Bone marrow derived-EPCs were isolated from rat femurs, and Dil-Ac-LDL and FITC-UEA-1 were added. **(A)** Morphology of bone marrow derived-EPCs cultures at different time after plating. Scale bar: 200µm. **(B)** Dil-acLDL and FITC-UEA-1 staining. Scale bar: 50µm. **(C)** Histograms for cell surface markers by flow cytometry. Three independent experiments were performed.
